## Widespread methane formation by *Cyanobacteria* in aquatic and terrestrial ecosystems

Bižić-Ionescu M.<sup>1\*#</sup>, Klintzsch T.<sup>2\*</sup>, Ionescu D.<sup>1\*</sup>, Hindiyeh M. Y.<sup>3</sup>, Günthel M.<sup>4</sup>, Muro-Pastor A.M.<sup>5</sup>, Eckert W.<sup>6</sup>, Keppler F.<sup>2,7</sup>, Grossart H-P<sup>1,8#</sup>

1. Leibniz Institute of Freshwater Ecology and Inland Fisheries (IGB), Alte Fischerhuetten 2, D-16775 Stechlin, Germany
2. Institute of Earth Sciences, Biogeochemistry Group, Heidelberg University, Heidelberg, Germany
3. Department of Water and Environmental Engineering, German Jordanian University, Amman, Jordan
4. Department of Biosciences, Swansea University, SA2 8PP Swansea, United Kingdom.
5. Instituto de Bioquímica Vegetal y Fotosíntesis, Consejo Superior de Investigaciones Científicas and Universidad de Sevilla, Sevilla, Spain
6. Israel Oceanographic and Limnological Research, The Yigal Alon Kinneret Limnological Laboratory, Migdal 14650, Israel
7. Heidelberg Center for the Environment (HCE), Heidelberg University, D-69120 Heidelberg, Germany
8. Institute of Biochemistry and Biology, Potsdam University, Maulbeerallee 2, 14469 Potsdam, Germany

\* These authors contributed equally to this work

# Correspondence should be addressed to:

**Mina Bižić-Ionescu**, Leibniz Institute of Freshwater Ecology and Inland Fisheries (IGB), Department of Experimental Limnology, Alte Fischerhuetten 2, Neuglobsow, OT Stechlin, 16775, Germany

Email: [mbizic@igb-berlin.de](mailto:mbizic@igb-berlin.de); Tel +49-33082-69969

**Hans-Peter Grossart**, Leibniz Institute of freshwater ecology and inland fisheries (IGB), Department of Experimental Limnology, Alte Fischerhuetten 2, Neuglobsow, OT Stechlin, 16775, Germany

Email: [hgrossart@igb-berlin.de](mailto:hgrossart@igb-berlin.de); Tel +49-33082-69991

The authors declare no conflict of interest

35 **Abstract**

36 Evidence is accumulating to challenge the paradigm that biogenic methanogenesis, traditionally  
37 considered a strictly anaerobic process, is exclusive to *Archaea*. Here we demonstrate that  
38 Cyanobacteria living in marine, freshwater and terrestrial environments produce methane at  
39 substantial rates under light and dark oxic and anoxic conditions, forming a link between light  
40 driven primary productivity and methane production in globally relevant group of phototrophs.  
41 Biogenic methane production was enhanced during oxygenic photosynthesis and directly  
42 attributed to the cyanobacteria by applying stable isotope labelling techniques. We suggest that  
43 formation of methane by *Cyanobacteria* may contribute to methane accumulation in oxygen-  
44 saturated surface waters of marine and freshwater ecosystems. Moreover, in these environments,  
45 cyanobacterial blooms already do, and might further occur more frequently during future global  
46 warming and thus have a direct feedback on climate change. We further highlight that  
47 cyanobacterial methane production not only affects recent and future global methane budgets, but  
48 also has implications for inferences on Earth's methane budget for the last 3.5 billion years, when  
49 this phylum is thought to have first evolved.

50 **Introduction**

51 Methane (CH<sub>4</sub>) is the second most important anthropogenic greenhouse gas after CO<sub>2</sub> and is  
52 estimated to have 28-34 times higher warming effect than the latter over a 100-year period  
53 (Intergovernmental Panel on Climate Change, 2014). The mixing ratio of CH<sub>4</sub> in the troposphere  
54 has increased from 715 ppbv in the preindustrial era to currently 1,860 ppbv (Nov. 2017 NOAA).  
55 Estimated global CH<sub>4</sub> emissions to the atmosphere average at ca. 560 Tg per year (1Tg = 10<sup>12</sup> g)  
56 exceeding the current estimated sinks by ca. 13 Tg per year (Tian et al., 2016). Thus, to mitigate

57 the constant increase in atmospheric CH<sub>4</sub> a comprehensive understanding of global CH<sub>4</sub> sources  
58 and the environmental parameters that affect them is necessary.

59 Traditionally, biogenic methanogenesis is the formation of methane under strictly anoxic  
60 conditions by microbes from the domain *Archaea* (phylogenetically distinct from both eukaryotes  
61 and *Bacteria*). However, in the past decade there has been growing evidence that also eukaryotes  
62 such as algae (Lenhart et al., 2016), plants (Keppler, Hamilton, Braß, & Röckmann, 2006), animals  
63 (Tuboly et al., 2013), fungi (Lenhart et al., 2012) and probably humans (Keppler et al., 2016)  
64 produce methane under oxic conditions albeit at considerably lower rates. These recent findings  
65 suggest that the phenomenon may not be solely limited to methanogenic *Archaea* and could  
66 include new metabolic pathways. For example, the conversion of methylated substrates such as  
67 methylphosphonates to CH<sub>4</sub> by *Bacteria* has been extensively addressed in recent years with  
68 regards to the “methane paradox” (Repeta et al., 2016; Wang, Dore, & McDermott, 2017).  
69 Recently, Zheng *et al.* (2018) have shown CH<sub>4</sub> formation by *Rhodospseudomonas palustris* during  
70 N<sub>2</sub> fixation. Methane emission was also detected from cryptogamic covers, i.e. phototrophic  
71 assemblages on plant, rock and soil surfaces (Lenhart et al., 2015).

72 Accumulation of CH<sub>4</sub> in oxygenated freshwater environments has been repeatedly associated with  
73 the presence of *Cyanobacteria* (see also Fig. S1). Methane production by *Cyanobacteria* has been  
74 attributed to either demethylation of methylphosphonates (Beverdorf, White, Björkman, Letelier,  
75 & Karl, 2010; Gomez-Garcia, Davison, Blain-Hartnung, Grossman, & Bhaya, 2011; Yao, Henny,  
76 & Maresca, 2016) or to the association of filamentous *Cyanobacteria* with methanogenic *Archaea*,  
77 providing the latter with the necessary hydrogen for CH<sub>4</sub> production (Berg, Lindblad, & Svensson,  
78 2014). *Cyanobacteria* are ubiquitous, found literally in any illuminated environment as well as  
79 unexpectedly in some dark subsurface ones as well (Hubalek et al., 2016; Puente-Sánchez et al.,

80 2018). Furthermore, this phylum predominated Earth whilst the environment was still reductive  
 81 and ca. 1.3 billion years prior to the great oxidation event which occurred 2.4 billion years ago  
 82 (Gumsley et al., 2017). Therefore, we tested whether this phylum contributes to the global CH<sub>4</sub>  
 83 budget independent of naturally occurring, extra-cellular precursor substances or the presence of  
 84 methanogenic *Archaea*. If so, their ubiquitous nature, their expected future increase in abundance  
 85 (Huisman et al., 2018; Visser et al., 2016) and their proximity to the interface with the atmosphere  
 86 makes them potential key players in the global CH<sub>4</sub> cycle.

87 Here we demonstrate that unicellular as well as filamentous, freshwater, marine and terrestrial  
 88 members of the prominent and ubiquitous phylum *Cyanobacteria*, a member of the domain  
 89 *Bacteria*, produce CH<sub>4</sub> at substantial rates under both light and dark, oxic and anoxic conditions.

## 90 **Material and Methods:**

### 91 **Cyanobacterial cultures**

92 Seventeen different cyanobacterial cultures were obtained from various sources and grown using  
 93 the media described in Table 1.

| Strain name                            | Source       | Morphology  | Growth medium | Incubation Temp. °C |
|----------------------------------------|--------------|-------------|---------------|---------------------|
| <i>Anabaena</i> sp. PCC7120            | IBVF         | Filamentous | BG11          | 30                  |
| <i>Anabaena cylindrica</i> ATCC29414   | IBVF         | Filamentous | BG11          | 30                  |
| <i>Anabaena borealis</i>               | CCALA        | Filamentous | BG11          | 30                  |
| <i>Scytonema hofmanni</i> PCC7110      | IBVF         | Filamentous | BG11          | 30                  |
| <i>Leptolyngbya</i> sp. (desert crust) | HUJI         | Filamentous | BG11          | 30                  |
| <i>Phormidium persicinum</i>           | IBVF         | Filamentous | f/2           | 26                  |
| <i>Trichodesmium erythraeum</i>        | MPI-MM       | Filamentous | YBCII         | 26                  |
| <i>Nodularia spumigena</i>             | IOW          | Filamentous | f/2 (8 psu)   | 20                  |
| <i>Chroococciopsis</i> sp. PCC9317     | IBVF         | Unicellular | BG11          | 30                  |
| <i>Microcystis aeruginosa</i> PCC7806  | IGB          | Unicellular | BG11          | 30                  |
| <i>Prochlorococcus</i> sp. MIT9313     | Uni Freiburg | Unicellular | AMP1          | 22                  |
| <i>Prochlorococcus</i> sp. MIT9312     | Haifa Uni    | Unicellular | ASW-Pro99     | 22                  |

|                                    |           |             |           |    |
|------------------------------------|-----------|-------------|-----------|----|
| <i>Prochlorococcus</i> sp. MIT0604 | Haifa Uni | Unicellular | FSW-Pro99 | 22 |
| <i>Prochlorococcus</i> sp. NATL2A  | Haifa Uni | Unicellular | ASW-Pro99 | 22 |
| <i>Prochlorococcus</i> sp. MED4    | Haifa Uni | Unicellular | ASW-Pro99 | 22 |
| <i>Synechococcus</i> sp. WH7803    | Haifa Uni | Unicellular | ASW-Pro99 | 22 |
| <i>Synechococcus</i> sp. WH8102    | Haifa Uni | Unicellular | ASW-Pro99 | 22 |

**Table 1.** Cyanobacterial cultures used in this study and their growth conditions. Shaded cultures are fully axenic while others are mono-cyanobacterial. Sources abbreviations: IBVF: Culture collection of the Institute for Plant Biochemistry and Photosynthesis, Sevilla Spain; CCALA: Culture collection of autotrophic organisms; HUJI: Laboratory of Aaron Kaplan, Hebrew University of Jerusalem, Jerusalem Israel; IOW: Laboratory of Falk Pollehne, Leibniz Institute for Baltic Sea research, Warnemünde, Germany; MPI-MM: Max Planck Institute for Marine Microbiology, Bremen, Germany; IGB: Leibniz Institute of Freshwater Ecology and Inland Fisheries, Neuglobsow, Germany; Uni. Freiburg, Laboratory of Claudia Steglich, Freiburg University, Freiburg, Germany. Haifa University, Laboratory of Daniel Sher. Media source: BG11 (Stanier, Deruelles, Rippka, Herdman, & Waterbury, 1979); f/2 (Guillard & Ryther, 1962); YBCII (Chen, Zehr, & Mellon, 1996); AMP1 (Moore et al., 2007); Filtered sea water (FSW) / Artificial sea water Pro99 (Moore et al., 2007).

## Stable isotope labeling experiments

### Culturing and treatments

To investigate the production of *Cyanobacteria*-derived CH<sub>4</sub>, 60 ml vials with 40 ml liquid and 20 ml head space volume (ambient air) were used and sealed with septa suitable for gas sampling. For the <sup>13</sup>C labelling experiments NaH<sup>13</sup>CO<sub>3</sub> (99 % purity, Sigma-Aldrich, Germany) was added amounting to 10 % of the initial dissolved inorganic carbon (DIC) in BG11 (Stanier et al., 1979) (DIC = 0.4 mM, enriched by added NaHCO<sub>3</sub>; pH ≈ 7.0) and 4.5 % of the DIC in f/2 medium (Guillard & Ryther, 1962) (DIC = 2015 μmol L<sup>-1</sup>; pH ≈ 8.2) and 1 % of the DIC in the Pro99 (Moore et al., 2007) based medium used for axenic *Synechococcus* and *Prochlorococcus* cultures. Four different examination groups were used: (1) Sterile medium; (2) Sterile medium with NaH<sup>13</sup>CO<sub>3</sub>; (3) Sterile medium with culture; (4) Sterile medium with culture and NaH<sup>13</sup>CO<sub>3</sub>; Four replicates of each cyanobacteria culture (n = 4).

119 The cultures were grown under a light–dark cycle of 16 and 8 hours at 22.5 °C at a light intensity  
120 of  $\approx 30 \mu\text{mol quanta m}^{-2} \text{s}^{-1}$  for a total period of 3 days.

### 121 **Continuous-flow isotope ratio mass spectrometry (CF-IRMS)**

122 CF-IRMS was employed for measurement of the  $\delta^{13}\text{C-CH}_4$  values in the head space gas above the  
123 cultures. Head space gas from exetainers was transferred to an evacuated sample loop (40 mL) and  
124 interfering compounds were then separated by GC and  $\text{CH}_4$  trapped on Hayesep D. The sample  
125 was then transferred to the IRMS system (ThermoFinniganDeltaplus XL, Thermo Finnigan,  
126 Bremen, Germany) via an open split. The working reference gas was carbon dioxide of high purity  
127 (carbon dioxide 4.5, Messer Griesheim, Frankfurt, Germany) with a known  $\delta^{13}\text{C}$  value of -23.64  
128 ‰ relative to Vienna Pee Dee Belemnite (V-PDB). All  $\delta^{13}\text{C-CH}_4$  values were corrected using three  
129  $\text{CH}_4$  working standards (isometric instruments, Victoria, Canada) calibrated against IAEA and  
130 NIST reference substances. The calibrated  $\delta^{13}\text{C-CH}_4$  values of the three working standards were -  
131  $23.9 \pm 0.2$  ‰,  $-38.3 \pm 0.2$  ‰, and  $-54.5 \pm 0.2$  ‰. The average standard deviations ( $n = 3$ ) of the  
132 CF-IRMS measurements were in the range of 0.1 to 0.3 ‰. All  $^{13}\text{C} / ^{12}\text{C}$ -isotope ratios are  
133 expressed in the conventional  $\delta$  notation in per mille (‰) vs. V-PDB, using the equation 1.

$$134 \quad \delta = \left[ \frac{(^{13}\text{C}/^{12}\text{C})_{\text{sample}}}{(^{13}\text{C}/^{12}\text{C})_{\text{standard}}} \right] - 1 \quad (1)$$

### 135 **Membrane inlet mass spectrometer experiments**

136 Experiments were conducted using a Bay Instruments (MD, USA) Membrane Inlet Mass  
137 Spectrometer (MIMS) consisting of a Pfeiffer Vacuum HiCube 80 Eco turbo pumping station  
138 connected to a QMG 220 M1, PrismaPlus®, C-SEM, 1-100 amu, Crossbeam ion source mass  
139 spectrometer (Pfeiffer Vacuum, Germany). Culture samples were pumped (Minipuls3, peristaltic

140 pump, Gilson) through a capillary stainless tubing connected to Viton® pump tubing as described  
141 in Kana *et al.* (Kana, Cornwell, & Zhong, 2006). The coiled stainless-steel tubing was immersed  
142 in a water bath to stabilize the sample temperature. Temperatures were set according to the growth  
143 conditions of the different cultures. Inside the vacuum inlet the sample passed through an 8 mm  
144 long semipermeable microbore silicone membrane (Silastic®, DuPont) before exiting the vacuum  
145 and returning to the culture chamber forming a closed system with respect to liquids. This required  
146 a 3.5 ml experimental chamber which consisted of an inner chamber where cultures were placed,  
147 and an isolated outer chamber connected to a water bath to maintain the culture at a constant  
148 temperature. The experimental chamber was placed on a magnetic stirrer and the cultures were  
149 continuously stirred for the duration of the experiments to prevent the formation of concentration  
150 gradients.

151 Cultures were transferred to fresh medium before the onset of each experiment after which 3.5 ml  
152 of the culture were transferred to the experimental chamber and an equal volume was used for  
153 determination of cell counts or dry weight. The latter was determined by filtering the samples on  
154 pre-weighed combusted GFF filters (Millipore) and drying at 105 °C for 48 h. In the case of non-  
155 homogenous cultures, the biomass from the experimental chamber was used at the end of the  
156 experiment for determination of dry weight. Marine picophytoplankton cultures were normalized  
157 by cell counting using a FACS Aria II flow cytometer (BD Biosciences, Heidelberg, Germany) at  
158 a flow rate of 23.5 µl / min for 2.5 min. Autofluorescence was used to separate cells from salt  
159 precipitates in the medium. Cells for counting were collected from the same batch used in the  
160 experimental chamber.

161 The light regime for the experiments was as follows: dark from 19:30 to 09:00 then light intensity  
162 was programmed to increase to 60, 120, 180, 400 µmol quanta m<sup>-2</sup> s<sup>-1</sup> with a hold time of 1.5 h at

163 each intensity. After maximum light the intensity was programmed to decrease in reverse order  
164 with the same hold times until complete darkness again at 19:30. Experiments lasted a minimum  
165 of 48 h with at least one replicate longer than 72 h. A minimum of 3 replicate experiments were  
166 conducted for each culture.

167 As negative controls ultrapure water as well as autoclave cyanobacterial biomass were measured  
168 to test for non-biogenic methane prosecution by the experimental system (Fig. S2).

### 169 **Methane calculations**

170 Methane (and oxygen) concentrations were calculated using the ratio relative to the inert gas Ar  
171 (m/z 40). Methane concentration was deduced from mass 15 which does not overlap with other  
172 gases in the sample (Schlüter & Gentz, 2008). The CH<sub>4</sub>, O<sub>2</sub> and Ar concentration in the different  
173 media were calculated based on known solubility constants (Powell, 1972) and were calibrated to  
174 the measured signals in MQ water and growth media at different temperatures. To further calibrate  
175 the CH<sub>4(mz15)</sub>/Ar ratio, measurements were conducted on air saturated water at different salinities  
176 (Fig. S3).

177 Methane production rates were calculated as the 1<sup>st</sup> derivative of the Savitzky-Golay (Savitzky &  
178 Golay, 1964) smoothed data using the `sgolay` function in the R package `signal` ([http://r-forge.r-  
179 project.org/projects/signal/](http://r-forge.r-project.org/projects/signal/)). To account for the continuous degassing from the CH<sub>4</sub>  
180 supersaturation experimental chamber, the degassing rate was determined experimentally using  
181 rapid heating of air-saturated water from 18 to 30 °C leading to an instant (super)saturation of 127  
182 % and 130 % for CH<sub>4</sub> and Ar, respectively. This procedure was repeated under two mixing  
183 conditions: I) mixing was applied via magnetic steering as conducted for most cultures; II) mixing  
184 occurred only via the cyclic pumping of sample through the MIMS membrane as applied to



185 *Synechococcus* and *Prochlorococcus* cultures. The change in concentration of CH<sub>4</sub> was monitored  
186 and a linear ( $R^2 = 0.95$ ) saturation degree dependent rate was determined. The determined rate  
187 given in Equations 2 and 3 for type I and type II mixing, respectively, was similar to that  
188 determined by comparing the most negative slopes of the culture experiments, when  
189 cyanobacterial production rates are expected to be minimal or zero, and the supersaturation state  
190 of the culture. Final rates were calculated by adding the absolute values of the local CH<sub>4</sub> slope (1<sup>st</sup>  
191 derivative) and the local degassing rate (equations. 2,3).

$$192 \quad R_{degassing} = -2.2365 \times 10^{-12} \times Sat_{(CH_4)} + 2.12656 \times 10^{-12} \quad (2)$$

$$193 \quad R_{degassing} = -8.8628 \times 10^{-14} \times Sat_{(CH_4)} + 3.5819 \times 10^{-14} \quad (3)$$

194 Where:  $R_{degassing}$  is the degassing rate in mol CH<sub>4</sub> sec<sup>-1</sup> and  $Sat_{(CH_4)}$  is the fraction CH<sub>4</sub>  
195 saturation state >1 (and <1.3) determined by measured concentration vs. calculated  
196 solubility.

### 197 **DNA extraction and sequencing**

198 To evaluate the presence of methanogenic *Archaea* in non-axenic cultures DNA was extracted as  
199 described in Nercessian *et al.* (Nercessian, Noyes, Kalyuzhnaya, Lidstrom, & Chistoserdova,  
200 2005). The resulting DNA was sent for Illumina sequencing at MrDNA (Shallowater, TX, USA)  
201 on a Miseq platform 2x300 bp using the Arch2A519F (CAGCMGCCGCGGTAA) and  
202 Arch1017R (GGCCATGCACCWCCTCTC) primers (Fischer, Güllert, Neulinger, Streit, &  
203 Schmitz, 2016). Archaeal community composition was analyzed using the SILVA-NGS pipeline  
204 (Ionescu *et al.*, 2012) (Fig. S4). After a standard PCR for the *mcrA* gene resulted in no visible  
205 products from any of the cultures a qPCR assay was conducted as well resulting in low copy

206 numbers of the gene (Fig. S4). The sequences were submitted to the European Nucleotide Archive  
207 under project number: PRJEB25851.

## 208 **Results and Discussion**

209 To test the hypothesis that *Cyanobacteria* directly produce CH<sub>4</sub> independent of methylated  
210 precursors (e.g. methylphosphonates) in ambient water, thirteen different filamentous and  
211 unicellular cyanobacterial cultures (for details of chosen cultures see Table 1) that are known to  
212 grow in marine, freshwater and terrestrial environments were incubated under sterile conditions  
213 with <sup>13</sup>C labelled sodium hydrogen carbonate (NaH<sup>13</sup>CO<sub>3</sub>) as carbon source. All investigated  
214 cyanobacterial cultures showed CH<sub>4</sub> production with increasing stable isotope values (δ<sup>13</sup>C-CH<sub>4</sub>  
215 values) clearly indicating that <sup>13</sup>C carbon was implemented into CH<sub>4</sub>, whereas no <sup>13</sup>C enrichment  
216 occurred in the control experiments (Fig. 1). These results unambiguously show that  
217 *Cyanobacteria* produce CH<sub>4</sub> *per se* and that the process is most likely linked to general cell  
218 metabolism such as photoautotrophic carbon fixation. The different enrichment of <sup>13</sup>C indicated  
219 by δ<sup>13</sup>C-CH<sub>4</sub> values ranging from 1.71 to 1337 ‰ observed in the different cultures is a result of  
220 different production rates as well as differences in biomass. The involvement of methanogenic  
221 *Archaea* in this process can be ruled out. First, five of the cultures were axenic. Second, the oxygen  
222 concentrations during CH<sub>4</sub> production were in most cases above saturation level (Fig. 2 and Fig.  
223 S2) and while methanogenic *Archaea* were recently reported from oxic environments (Angle et  
224 al., 2017), their activity is attributed to anoxic microniches. Third, sequencing analysis of non-  
225 axenic cultures and quantitative real-time PCR of the *mcrA* gene showed methanogenic *Archaea*  
226 are either absent or present in negligible numbers (Fig. S4).

227 Furthermore, demethylation of methylphosphonates from the spent growth medium is unlikely to  
228 be the mechanism involved in this instance even though some *Cyanobacteria* do possess the

229 necessary enzymatic machinery (Beverdorf et al., 2010; Gomez-Garcia et al., 2011) for the  
230 following reasons. First, thus far, demethylation of methylphosphonates has been shown to occur  
231 only under phosphorus starvation, which was highly unlikely in this study since the culture  
232 medium contained ca. 200  $\mu\text{mol P L}^{-1}$ . Indeed, publicly available transcriptomic data for *Anabaena*  
233 sp. PCC 7120 (Flaherty, Van Nieuwerburgh, Head, & Golden, 2011; Mitschke, Vioque, Haas,  
234 Hess, & Muro-Pastor, 2011) and *Trichodesmium erythraeum* (Pfreundt, Kopf, Belkin, Berman-  
235 Frank, & Hess, 2014) show no evidence for activity of the phosphonate C-P lyase genes under  
236 standard (P-rich) culture conditions. Secondly, some of the *Cyanobacteria* used in this study (i.e.  
237 *Microcystis aeruginosa* PCC 7806, *Synechococcus* WH7803 and WH8102, as well as all  
238 sequenced species of *Chroococidiopsis* sp., *Leptolyngbya* sp. and *Phormidium* sp. and  
239 *Prochlorococcus*) do not possess the known C-P lyase genes necessary for conversion of  
240 methylphosphonates to  $\text{CH}_4$ . The lack of the *phn* genes (gene operon for phosphonate metabolism)  
241 was demonstrated to be a common feature of the genus *Prochlorococcus* (Luo & Konstantinidis,  
242 2011). *T. erythraeum* was shown to internally produce phosphonates as P storage later to be freed  
243 by demethylation (Dyrman, Benitez-Nelson, Orchard, Haley, & Pellechia, 2009), a process that  
244 is likely to release  $\text{CH}_4$ . Nevertheless, the same study shows, though not focusing on cyanobacteria  
245 alone, that marine unicellular organisms such as *Synechococcus* and *Crocospaera*, do not contain  
246 a detectable phosphonate storage.

247 Despite the recent finding of  $\text{CH}_4$  production during  $\text{N}_2$  fixation by *Rhodopseudomonas palustris*  
248 (Zheng et al., 2018) we suggest that this is not the pathway leading to  $\text{CH}_4$  production in our  
249 experiments. First, most *Cyanobacteria* used in this study are unable (i.e marine *Synechococcus*,  
250 *Prochlorococcus*, *Microcystis aeruginosa*) or unknown (*Leptolyngbya* sp., *Phormidium*  
251 *persicinum*) to fix  $\text{N}_2$ . Second, all experiments were conducted in  $\text{NO}_3^-$  or  $\text{NH}_4^+$  rich, fresh, media,

252 and therefore N<sub>2</sub> fixation in capable cyanobacteria is likely to be inhibited to a certain degree  
253 (Knapp, 2012). Thus, given the rapid and tight response of CH<sub>4</sub> production with the onset of light,  
254 we consider that the mechanism by which *Cyanobacteria* readily convert fixed CO<sub>2</sub> to CH<sub>4</sub> under  
255 light conditions must revolve around their central metabolism. Inhibitors of photosynthesis such  
256 as Atrazine and DBMIB (2,5-Dibromo-6-isopropyl-3-methyl-1,4-benzoquinone) inhibit the  
257 methane production under light conditions, however, the exact biochemical pathway(s) involved  
258 in cyanobacteria-derived CH<sub>4</sub> formation remain so far unknown and thus require further  
259 investigation.

260 Patterns and rates of CH<sub>4</sub> production were investigated in seventeen cultures over several days of  
261 continuous measurement of CH<sub>4</sub> concentration using a membrane inlet mass spectrometry system  
262 (MIMS). Our measurements, lasting 2-5 days, showed that CH<sub>4</sub> production occurs both under light  
263 and dark conditions (Fig. 2 and Fig. S2). This is evident by a positive production rate at almost all  
264 times in all experiments. Replicate experiments revealed that, while *Cyanobacteria* repeatedly  
265 produced CH<sub>4</sub>, rates and patterns were not consistent, particularly so for production during the  
266 periods of darkness. Often, a period with lower rates of CH<sub>4</sub> production was observed between  
267 light and dark phases (Fig. 2 and Fig. S2). The latter is evidenced as a decrease in CH<sub>4</sub>  
268 concentration resulting from degassing of our incubation system. This suggests that different  
269 mechanisms may be involved in CH<sub>4</sub> production under light and dark conditions, presumably  
270 dependent on freshly generated photosynthetic products during light and on storage compounds  
271 during dark periods. Fermentation of storage compounds by *Cyanobacteria* has been previously  
272 described and known to produce among other compounds acetate and hydrogen which are known  
273 precursors of acetoclastic CH<sub>4</sub> formation (Stal & Moezelaar, 1997). Interestingly, most of the  
274 genes required for methanogenesis are present in non-methanogenic organisms, including

275 *Cyanobacteria*. Nevertheless, in this instance since the methyl-coenzyme reductase (*mcr*) gene is  
 276 absent this would suggest that if *Cyanobacteria* produce CH<sub>4</sub> via conventional pathways, an  
 277 ortholog of the *mcr* gene exists.

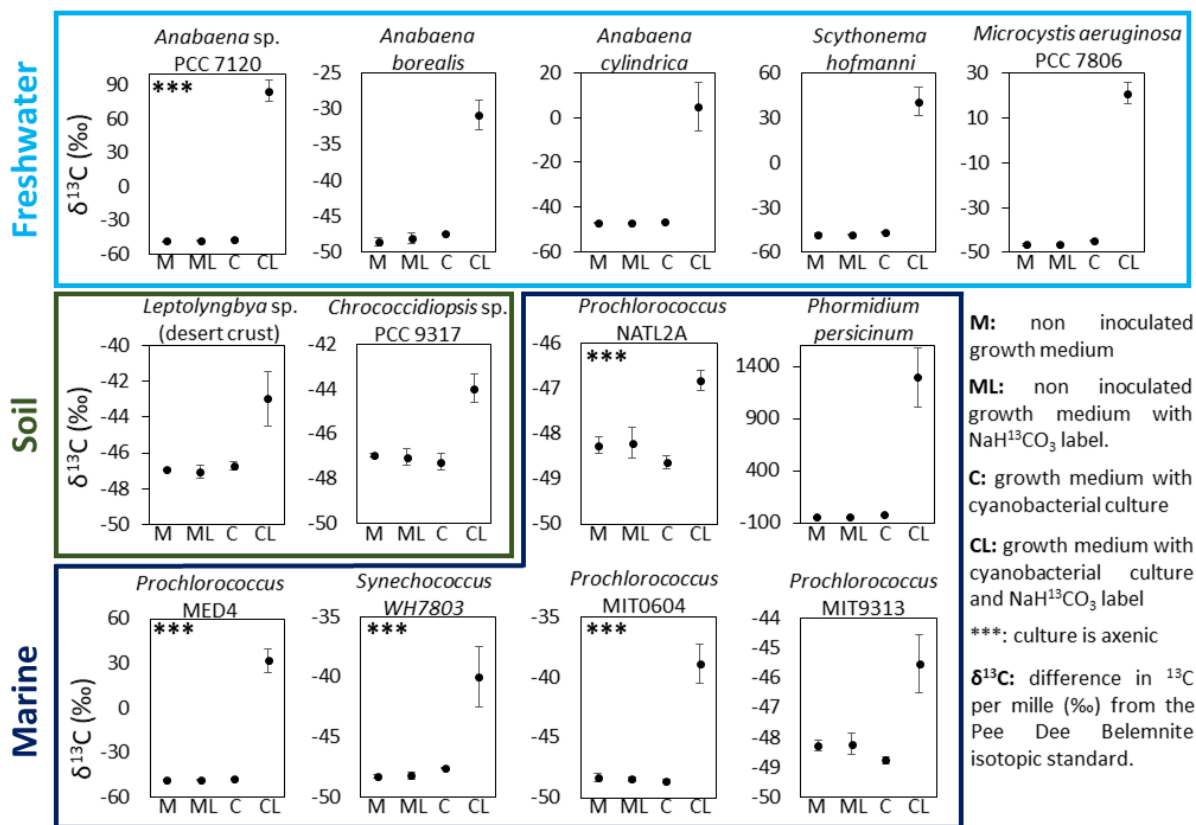

**Figure 1.** δ<sup>13</sup>C-CH<sub>4</sub> values measured during incubation experiments of fifteen different filamentous and unicellular freshwater, soil and marine cyanobacterial cultures with and without NaH<sup>13</sup>CO<sub>3</sub> supplementation. All cyanobacterial cultures produced CH<sub>4</sub>. Using NaH<sup>13</sup>CO<sub>3</sub> as carbon source (CL) resulted in increasing stable δ<sup>13</sup>C-CH<sub>4</sub> values as compared to the starting condition. This establishes the direct link between carbon fixation and CH<sub>4</sub> production. The <sup>13</sup>C enrichment is not quantitative and thus not comparable between cultures. Error bars represent standard deviation (n=4).

278

279 Methane production rates (Fig. 3) were calculated using the slope of CH<sub>4</sub> profiles and were  
 280 normalized on a cyanobacterial biomass dry weight basis for larger cyanobacteria or cell counts  
 281 for small-celled marine picophytoplankton. The latter to obtain high accuracy for the small-cell-  
 282 sized picophytoplankton, *Synechococcus* and *Prochlorococcus*. Hourly CH<sub>4</sub> production rates

283 across cultures of larger cyanobacteria were in the range of 0.1 to 3.4  $\mu\text{mol g}^{-1} \text{h}^{-1}$  in individual  
284 experiments and a mean of  $0.51 \pm 0.26 \mu\text{mol g}^{-1} \text{h}^{-1}$ . Among the marine picophytoplankton  
285 *Synechococcus* sp. exhibited low rates ranging between  $10^{-4}$  and  $10^{-2} \mu\text{mol CH}_4$  per  $10^6$  cells, while  
286 *Prochlorococcus* cultures produced methane at rates ranging from 0.01 to 5  $\mu\text{mol CH}_4$  per  $10^6$   
287 cells. When compared to production rates of typical methanogenic *Archaea*,  $\text{CH}_4$  production rates  
288 of freshwater, soil and large marine cyanobacteria are three to four orders of magnitude lower than  
289 the  $\text{CH}_4$  production rates noted for typical methanogenic *Archaea* in culture under optimal  
290 conditions (oxygen free) but one to three orders of magnitude higher than rates observed in  
291 eukaryotes (Fig. S5). Due to their small size, conversion of  $\text{CH}_4$  production rates of  
292 picophytoplankton to  $\mu\text{mol g}^{-1} \text{h}^{-1}$  results in values exceeding those of methanogenic *Archaea*.  
293 Nevertheless, to obtain 1 g of *Prochlorococcus* cells one would need to integrate 0.1-10  $\text{m}^2$  over  
294 a depth of 200 m (Lange et al., 2018) as compared to ca. 20 Kg of soil for methanogenic *Archaea*  
295 (assuming  $10^9$  cells per g sediment of which 50 % are methanogens). In our experiments,  
296 *Prochlorococcus* and *Synechococcus* cultures produced  $\text{CH}_4$  only at light intensities above 20  
297  $\mu\text{mol quanta m}^{-2} \text{s}^{-1}$  and therefore, it is likely that only surface *Prochlorococcus* and  
298 *Synechococcus* communities contribute to the oceanic  $\text{CH}_4$  flux to the atmosphere.

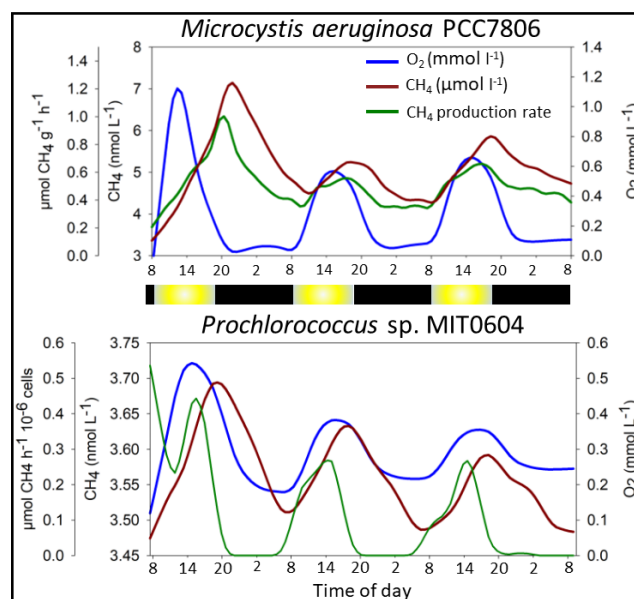

**Figure 2.** Continuous measurement of CH<sub>4</sub> and oxygen under light/dark periods using a membrane inlet mass spectrometer (MIMS). Examples are shown for two cultures. Data for other cultures can be found in Fig. S2. A decrease in CH<sub>4</sub> concentration is a result of either reduced, or no, production coupled with degassing from the supersaturated, continuously-mixing, semi-open incubation chamber towards equilibrium with atmospheric CH<sub>4</sub> (2.5 nM and 2.1 nM for freshwater and seawater, respectively). Calculated CH<sub>4</sub> production rates account for the continuous emission of CH<sub>4</sub> from the incubation chamber for as long as the CH<sub>4</sub> concentrations are supersaturated. The light regime for the experiments was as follows: dark (black bar) from 19:30 to 09:00 then light intensity (yellow bar) was programmed to increase to 60, 120, 180, 400 μmol quanta m<sup>-2</sup> s<sup>-1</sup> with a hold time of 1.5 h at each intensity. After the maximum light period the intensity was programmed to decrease in reverse order with the same hold times until complete darkness again at 19:30.

299

300 Methane production in oxic soils has been previously discussed and attributed mainly to abiotic  
 301 factors (Jugold et al., 2012) or methanogenic *Archaea* (Hao, Scharffe, Crutzen, & Sanhueza,  
 302 1988), although the latter was thought unlikely (Jugold et al., 2012; Kammann, Hepp, Lenhart, &  
 303 Müller, 2009). Here we show that a typical desert crust *Cyanobacteria* (identified in this study as  
 304 *Leptolyngbya* sp.), as well as the most common endolithic cyanobacterium *Chroococcidiopsis*  
 305 (Garcia-Pichel, Belnap, Neuer, & Schanz, 2003) produce CH<sub>4</sub> both under light and dark conditions

306 (Fig. 1, Fig. S2), thus inferring a new but as yet unknown and unaccounted for source of CH<sub>4</sub> from  
 307 oxic soils.

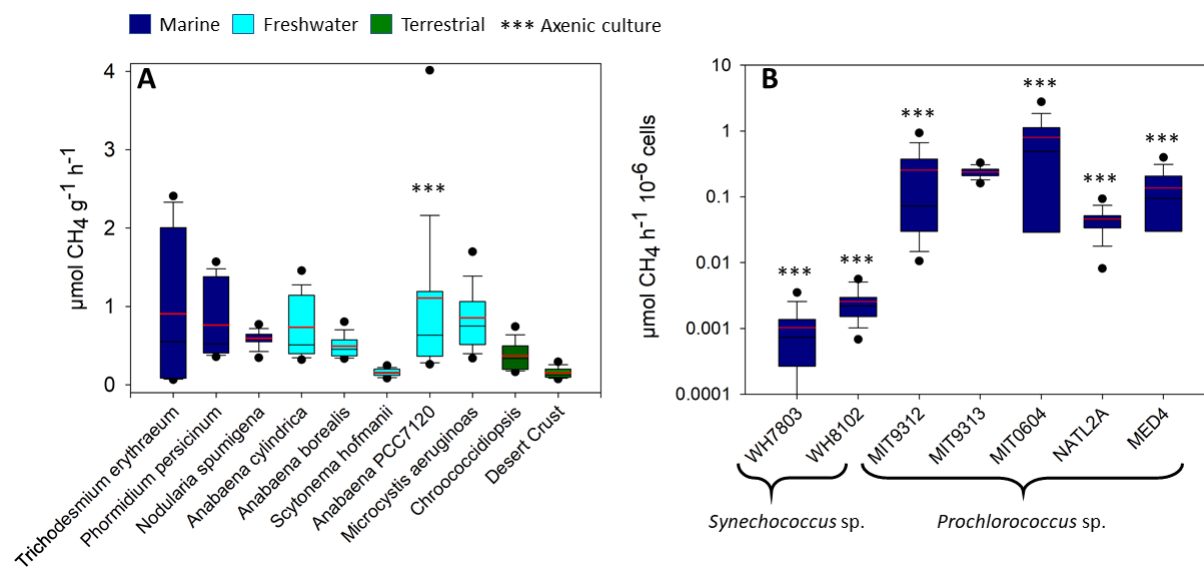

**Figure 3.** Average CH<sub>4</sub> production rates (μmol g DW<sup>-1</sup> h<sup>-1</sup>) obtained from multiple long-term measurements (2-5 days) using a membrane inlet mass spectrometer. The rates are designated by colour according to the environment from which the *Cyanobacteria* were originally isolated; dark blue, light blue and green for marine, freshwater and soil environments, respectively. Black and red lines represent median and mean values, respectively.

308  
 309 *Cyanobacteria* are ubiquitous in nature and their presence in aquatic systems is expected to  
 310 increase with eutrophication and rising global temperatures (Visser et al., 2016). The “methane  
 311 paradox” describing the production of CH<sub>4</sub> in oxic water layers has been known for four decades  
 312 (Scranton & Farrington, 1977). Though values may vary between water bodies, a recent study  
 313 suggests that up to 90 % of CH<sub>4</sub> emitted from freshwater lakes can be produced in the oxic layer  
 314 (Donis et al., 2017) with *Cyanobacteria* often being associated with elevated CH<sub>4</sub> concentration  
 315 in oxygen supersaturated freshwater systems (Grossart, Frindte, Dziallas, Eckert, & Tang, 2011).  
 316 In open oceanic environments, distant from any coastal, the contribution of lateral transport from  
 317 anoxic environments is expected to nonexistent. Nevertheless, based on the emission rates of our



318 laboratory investigations it is difficult to extrapolate the contribution of cyanobacteria to marine,  
319 freshwater and terrestrial environments and finally to the global scale. First, only one attempt has  
320 been done to estimate the global cyanobacterial biomass (Garcia-Pichel et al., 2003). This study  
321 does not account for the increase in blooms of toxic and non-toxic cyanobacteria in freshwater  
322 systems (Bowling, Blais, & Sinotte, 2015; Glibert, Maranger, Sobota, & Bouwman, 2014;  
323 Huisman et al., 2018; Paerl & Huisman, 2008; Visser et al., 2016), nor for less monitored  
324 cyanobacterial environments such under the ice-cover of frozen lakes (Bižić-Ionescu, Amann, &  
325 Grossart, 2014). Recent evaluations of *Prochlorococcus* (Lange et al., 2018) suggest a global  
326 biomass larger by 33 % than estimated in 2003 by Garcia-Pichel *et al.* Second, while our  
327 experiments demonstrate inarguably the ability of *Cyanobacteria* to produce CH<sub>4</sub> independent of  
328 external substrates, as well as to transfer fixed CO<sub>2</sub> to CH<sub>4</sub> under laboratory conditions, we cannot  
329 account for the effect of nutrients concentrations and light quality in the natural environment.  
330 Nevertheless, to get a first idea of what the laboratory rates might sum up to when applied to the  
331 natural environment we performed a simple mathematical exercise for the oceanic  
332 *Prochlorococcus* community. As suggested before, since experiments with low light (< 20 μmol  
333 quanta m<sup>-2</sup> s<sup>-1</sup>) showed no detectable CH<sub>4</sub> production only surface *Prochlorococcus* communities  
334 were used for this calculation. As such, only rates from High-Light *Prochlorococcus* strains were  
335 used i.e. MIT9312, MIT0604 and MED4 averaging at 0.4 μmol CH<sub>4</sub> h<sup>-1</sup> 10<sup>-6</sup> cells. Based on recent  
336 estimates of *Prochlorococcus* abundances (Lange et al., 2018) the standing stock global surface  
337 communities were estimated to consist of 2.48×10<sup>19</sup> cells (out of a total of 3.4×10<sup>27</sup>). When taken  
338 together, these numbers result in a potential production by global surface *Prochlorococcus*  
339 communities of 1.39 Tg CH<sub>4</sub> y<sup>-1</sup>. This number is not to be confused with the oceanic CH<sub>4</sub> flux,

340 estimated at 1.2 Tg CH<sub>4</sub> y<sup>-1</sup> (Rhee, Kettle, & Andreae, 2009), which is the result of production by  
341 multiple processes, transport and consumption by methanotrophs.

342 In this study, we show that *Cyanobacteria* can readily convert fixed inorganic carbon directly to  
343 CH<sub>4</sub> and emit the potent greenhouse gas under both light and dark conditions. This is in addition  
344 to the already established ability of *Cyanobacteria* to produce CH<sub>4</sub> by the demethylation of  
345 methylphosphonates (Beverdorf et al., 2010; Gomez-Garcia et al., 2011). *Cyanobacteria* as a  
346 phylum are the most ubiquitous group of organisms on Earth, thriving in most, naturally and  
347 artificially, illuminated environments almost regardless of temperatures, salinity and nutrient  
348 concentrations. Accordingly, their ability to produce CH<sub>4</sub> via different pathways, likely related to  
349 their surroundings, makes them important to the present and future global CH<sub>4</sub> cycle and budget.  
350 Even more so, as blooms of cyanobacteria are increasing with eutrophication and rising global  
351 temperatures (Huisman et al., 2018; Visser et al., 2016). Furthermore, as phototrophic prokaryotes  
352 such as *Cyanobacteria* have been inhabiting Earth for more than 3.5 billion years (Falcón,  
353 Magallón, & Castillo, 2010; Frei et al., 2016) they may have had a major contribution to Earth's  
354 CH<sub>4</sub> cycle such as during the great oxygenation event or even earlier when the conditions on Earth  
355 were more reductive favoring CH<sub>4</sub> production.

356 Further research, however, is needed to elucidate the biochemical pathways of CH<sub>4</sub> formation in  
357 *Cyanobacteria* and fully assess its possible relevance for ecology and the global CH<sub>4</sub> budget  
358 throughout Earth history and how it might change in the future.

359

360 **Acknowledgements**

361 *In-situ* probe data was obtained from the LakeLab ([www.lakelab.de](http://www.lakelab.de)) as part of the routine  
362 monitoring of Lake Stechlin run by the Leibniz Institute of Freshwater Ecology and Inland  
363 Fisheries. We thank the technical assistants of department III for making this data available. We  
364 thank the members of the MIBI group and particularly Jason Woodhouse for assistance in  
365 sampling, analysis and discussion of the data. We thank Tim Urich from Greifswald University  
366 for the qPCR analysis. We thank Claudia Steglich and Wolfgang Hess from Freiburg University  
367 for the *Prochlorococcus* culture. We thank Falk Pollehne from the Institute of Baltic Sea Research  
368 for the *Nodularia* culture. We thank Meri Eichner from the Max Planck Institute for Marine  
369 Microbiology for the *Trichodesmium* culture. We thank Daniel Sher and Dalit Roth from Haifa  
370 University for the cultures of *Synechococcus* WH7803 and WH8102 and *Prochlorococcus*  
371 MIT9312, NATL2A, MIT0604, MED4. Funding was provided to M.B.I., D.I. and H.P.G. via the  
372 DFG-Aquameth project (GR1540-21-1), the BMBF-BIBS project (01LC1501G) and the Human  
373 Frontiers Science project (HFSP 2039371). F.K. and T.K. were supported by the German Research  
374 Foundation (DFG; KE 884/8-2, KE 884/11-1 and KE 884/16-2).

375

### 376 **Author Contributions**

377 M.B.I., T.K., D.I., F.K., H.P.G., conceived the study and designed the experiments; M.B.I., D.I.,  
378 M.Y.H., M.G., A.M.M.P., W.E., performed MIMS experiments and *in-situ* measurements and  
379 analyzed the data; T.K. performed stable isotope measurements and together with F.K. analyzed  
380 the data. M.B.I., D.I., performed microbial community data analysis; A.M.M.P. analyzed  
381 transcriptomics data. M.B.I., T.K., D.I., M.Y.H., M.G., A.M.M.P., W.E., F.K., H.P.G. discussed  
382 the results and wrote the paper.

## 383 References

- 384 Angle, J. C., Morin, T. H., Solden, L. M., Narrowe, A. B., Smith, G. J., Borton, M. A., ...  
385 Wrighton, K. C. (2017). Methanogenesis in oxygenated soils is a substantial fraction of  
386 wetland methane emissions. *Nature Communications*, 8(1), 1567.  
387 <https://doi.org/10.1038/s41467-017-01753-4>
- 388 Berg, A., Lindblad, P., & Svensson, B. H. (2014). Cyanobacteria as a source of hydrogen for  
389 methane formation. *World Journal of Microbiology and Biotechnology*, 30(2), 539–545.  
390 <https://doi.org/10.1007/s11274-013-1463-5>
- 391 Beversdorf, L. J., White, A. E., Björkman, K. M., Letelier, R. M., & Karl, D. M. (2010).  
392 Phosphonate metabolism by *Trichodesmium* IMS101 and the production of greenhouse  
393 gases. *Limnology and Oceanography*, 55(4), 1768–1778.  
394 <https://doi.org/10.4319/lo.2010.55.4.1768>
- 395 Bižić-Ionescu, M., Amann, R., & Grossart, H.-P. (2014). Massive regime shifts and high activity  
396 of heterotrophic bacteria in an ice-covered lake. *PLoS ONE*, 9(11), e113611.  
397 <https://doi.org/10.1371/journal.pone.0113611>
- 398 Bowling, L. C., Blais, S., & Sinotte, M. (2015). Heterogeneous spatial and temporal  
399 cyanobacterial distributions in Missisquoi Bay, Lake Champlain: An analysis of a 9 year  
400 data set. *Journal of Great Lakes Research*, 41(1), 164–179.  
401 <https://doi.org/10.1016/J.JGLR.2014.12.012>
- 402 Chen, Y.-B., Zehr, J. P., & Mellon, M. (1996). Growth and nitrogen fixation of the diazotrophic  
403 filamentous nonheterocystous cyanobacterium *trichodesmium* sp. IMS 101 in defined  
404 media: evidence for a circadian rhythm. *Journal of Phycology*, 32(6), 916–923.  
405 <https://doi.org/10.1111/j.0022-3646.1996.00916.x>
- 406 Donis, D., Flury, S., Stöckli, A., Spangenberg, J. E., Vachon, D., & McGinnis, D. F. (2017).  
407 Full-scale evaluation of methane production under oxic conditions in a mesotrophic lake.  
408 *Nature Communications*, 8(1), 1661. <https://doi.org/10.1038/s41467-017-01648-4>
- 409 Dyrhman, S. T., Benitez-Nelson, C. R., Orchard, E. D., Haley, S. T., & Pellechia, P. J. (2009). A  
410 microbial source of phosphonates in oligotrophic marine systems. *Nature Geoscience*,  
411 2(10), 696–699. <https://doi.org/10.1038/ngeo639>
- 412 Falcón, L. I., Magallón, S., & Castillo, A. (2010). Dating the cyanobacterial ancestor of the  
413 chloroplast. *The ISME Journal*, 4(6), 777–783. <https://doi.org/10.1038/ismej.2010.2>
- 414 Fischer, M. A., Güllert, S., Neulinger, S. C., Streit, W. R., & Schmitz, R. A. (2016). Evaluation  
415 of 16S rRNA Gene Primer Pairs for Monitoring Microbial Community Structures Showed  
416 High Reproducibility within and Low Comparability between Datasets Generated with  
417 Multiple Archaeal and Bacterial Primer Pairs. *Frontiers in Microbiology*, 7.  
418 <https://doi.org/10.3389/fmicb.2016.01297>
- 419 Flaherty, B. L., Van Nieuwerburgh, F., Head, S. R., & Golden, J. W. (2011). Directional RNA  
420 deep sequencing sheds new light on the transcriptional response of *Anabaena* sp. strain PCC  
421 7120 to combined-nitrogen deprivation. *BMC Genomics*, 12, 332.

- 422 <https://doi.org/10.1186/1471-2164-12-332>
- 423 Frei, R., Crowe, S. A., Bau, M., Polat, A., Fowle, D. A., & Døssing, L. N. (2016). Oxidative  
424 elemental cycling under the low O<sub>2</sub> Eoarchean atmosphere. *Scientific Reports*, 6(1), 21058.  
425 <https://doi.org/10.1038/srep21058>
- 426 Garcia-Pichel, F., Belnap, J., Neuer, S., & Schanz, F. (2003). Estimates of global cyanobacterial  
427 biomass and its distribution. *Algological Studies*, 109(1), 213–227.  
428 <https://doi.org/10.1127/1864-1318/2003/0109-0213>
- 429 Glibert, P. M., Maranger, R., Sobota, D. J., & Bouwman, L. (2014). The Haber Bosch–harmful  
430 algal bloom (HB–HAB) link. *Environmental Research Letters*, 9(10), 105001.  
431 <https://doi.org/10.1088/1748-9326/9/10/105001>
- 432 Gomez-Garcia, M. R., Davison, M., Blain-Hartnung, M., Grossman, A. R., & Bhaya, D. (2011).  
433 Alternative pathways for phosphonate metabolism in thermophilic cyanobacteria from  
434 microbial mats. *The ISME Journal*, 5(1), 141–149. <https://doi.org/10.1038/ismej.2010.96>
- 435 Grossart, H.-P., Frindte, K., Dziallas, C., Eckert, W., & Tang, K. W. (2011). Microbial methane  
436 production in oxygenated water column of an oligotrophic lake. *Proceedings of the  
437 National Academy of Sciences*, 108(49), 19657–19661.  
438 <https://doi.org/10.1073/pnas.1110716108>
- 439 Guillard, R. R. L., & Ryther, J. H. (1962). Studies of marine planktonic diatoms. *Can. J.  
440 Microbiol.*, 8, 229–239.
- 441 Gumsley, A. P., Chamberlain, K. R., Bleeker, W., Söderlund, U., de Kock, M. O., Larsson, E. R.,  
442 & Bekker, A. (2017). Timing and tempo of the Great Oxidation Event. *Proceedings of the  
443 National Academy of Sciences of the United States of America*, 114(8), 1811–1816.  
444 <https://doi.org/10.1073/pnas.1608824114>
- 445 Hao, W. M., Scharffe, D., Crutzen, P. J., & Sanhueza, E. (1988). Production of N<sub>2</sub>O, CH<sub>4</sub>, and  
446 CO<sub>2</sub> from soils in the tropical savanna during the dry season. *Journal of Atmospheric  
447 Chemistry*, 7(1), 93–105. <https://doi.org/10.1007/BF00048256>
- 448 Hubalek, V., Wu, X., Eiler, A., Buck, M., Heim, C., Dopson, M., ... Ionescu, D. (2016).  
449 Connectivity to the surface determines diversity patterns in subsurface aquifers of the  
450 Fennoscandian shield. *The ISME Journal*, 10(10), 2447–2458.  
451 <https://doi.org/10.1038/ismej.2016.36>
- 452 Huisman, J., Codd, G. A., Paerl, H. W., Ibelings, B. W., Verspagen, J. M. H., & Visser, P. M.  
453 (2018). Cyanobacterial blooms. *Nature Reviews Microbiology*, 16(8), 471–483.  
454 <https://doi.org/10.1038/s41579-018-0040-1>
- 455 Intergovernmental Panel on Climate Change (Ed.). (2014). *Climate Change 2013 - The Physical  
456 Science Basis*. Cambridge: Cambridge University Press.  
457 <https://doi.org/10.1017/CBO9781107415324>
- 458 Ionescu, D., Siebert, C., Polerecky, L., Munwes, Y. Y., Lott, C., Häusler, S., ... de Beer, D.  
459 (2012). Microbial and chemical characterization of underwater fresh water springs in the  
460 Dead Sea. *PloS One*, 7(6), e38319. <https://doi.org/10.1371/journal.pone.0038319>

- 461 Jugold, A., Althoff, F., Hurkuck, M., Greule, M., Lenhart, K., Lelieveld, J., & Keppler, F.  
462 (2012). Non-microbial methane formation in oxic soils. *Biogeosciences*, *9*(12), 5291–5301.  
463 <https://doi.org/10.5194/bg-9-5291-2012>
- 464 Kammann, C., Hepp, S., Lenhart, K., & Müller, C. (2009). Stimulation of methane consumption  
465 by endogenous CH<sub>4</sub> production in aerobic grassland soil. *Soil Biology and Biochemistry*,  
466 *41*(3), 622–629. <https://doi.org/10.1016/j.soilbio.2008.12.025>
- 467 Kana, T. M., Cornwell, J. C., & Zhong, L. (2006). Determination of denitrification in the  
468 Chesapeake Bay from measurements of N<sub>2</sub> accumulation in bottom water. *Estuaries and*  
469 *Coasts*, *29*(2), 222–231. <https://doi.org/10.1007/BF02781991>
- 470 Keppler, F., Hamilton, J. T. G., Braß, M., & Röckmann, T. (2006). Methane emissions from  
471 terrestrial plants under aerobic conditions. *Nature*, *439*(7073), 187–191.  
472 <https://doi.org/10.1038/nature04420>
- 473 Keppler, F., Schiller, A., Eehalt, R., Greule, M., Hartmann, J., & Polag, D. (2016). Stable  
474 isotope and high precision concentration measurements confirm that all humans produce  
475 and exhale methane. *Journal of Breath Research*, *10*(1), 016003.  
476 <https://doi.org/10.1088/1752-7155/10/1/016003>
- 477 Knapp, A. N. (2012). The sensitivity of marine N<sub>2</sub> fixation to dissolved inorganic nitrogen.  
478 *Frontiers in Microbiology*, *3*(OCT), 374. <https://doi.org/10.3389/fmicb.2012.00374>
- 479 Lange, P. K., Brewin, R. J. W., Dall’Olmo, G., Tarran, G. A., Sathyendranath, S., Zubkov, M., &  
480 Bouman, H. A. (2018). Scratching beneath the surface: A model to predict the vertical  
481 distribution of Prochlorococcus using remote sensing. *Remote Sensing*, *10*(6), 847.  
482 <https://doi.org/10.3390/rs10060847>
- 483 Lenhart, K., Bunge, M., Ratering, S., Neu, T. R., Schüttmann, I., Greule, M., ... Keppler, F.  
484 (2012). Evidence for methane production by saprotrophic fungi. *Nature Communications*, *3*,  
485 1046. <https://doi.org/10.1038/ncomms2049>
- 486 Lenhart, K., Klintzsch, T., Langer, G., Nehrke, G., Bunge, M., Schnell, S., & Keppler, F. (2016).  
487 Evidence for methane production by the marine algae *Emiliana huxleyi*. *Biogeosciences*,  
488 *13*(10), 3163–3174. <https://doi.org/10.5194/bg-13-3163-2016>
- 489 Lenhart, K., Weber, B., Elbert, W., Steinkamp, J., Clough, T., Crutzen, P., ... Keppler, F. (2015).  
490 Nitrous oxide and methane emissions from cryptogamic covers. *Global Change Biology*,  
491 *21*(10), 3889–3900. <https://doi.org/10.1111/gcb.12995>
- 492 Luo, C., & Konstantinidis, K. T. (2011). Phosphorus-related gene content is similar in  
493 Prochlorococcus populations from the North Pacific and North Atlantic Oceans.  
494 *Proceedings of the National Academy of Sciences of the United States of America*, *108*(16),  
495 E62-3; author reply E64-6. <https://doi.org/10.1073/pnas.1018662108>
- 496 Mitschke, J., Vioque, A., Haas, F., Hess, W. R., & Muro-Pastor, A. M. (2011). Dynamics of  
497 transcriptional start site selection during nitrogen stress-induced cell differentiation in  
498 *Anabaena* sp. PCC7120. *Proceedings of the National Academy of Sciences of the United*  
499 *States of America*, *108*(50), 20130–20135. <https://doi.org/10.1073/pnas.1112724108>
- 500 Moore, L. R., Coe, A., Zinser, E. R., Saito, M. A., Sullivan, M. B., Lindell, D., ... Chisholm, S.

- 501 W. (2007). Culturing the marine cyanobacterium *Prochlorococcus*. *Limnology and*  
502 *Oceanography: Methods*, 5(10), 353–362. <https://doi.org/10.4319/lom.2007.5.353>
- 503 Nercessian, O., Noyes, E., Kalyuzhnaya, M. G., Lidstrom, M. E., & Chistoserdova, L. (2005).  
504 Bacterial populations active in metabolism of C1 compounds in the sediment of Lake  
505 Washington, a freshwater lake. *Applied and Environmental Microbiology*, 71(11), 6885–  
506 6899. <https://doi.org/10.1128/AEM.71.11.6885-6899.2005>
- 507 Paerl, H. W., & Huisman, J. (2008). CLIMATE: Blooms Like It Hot. *Science*, 320(5872), 57–58.  
508 <https://doi.org/10.1126/science.1155398>
- 509 Pfreundt, U., Kopf, M., Belkin, N., Berman-Frank, I., & Hess, W. R. (2014). The primary  
510 transcriptome of the marine diazotroph *Trichodesmium erythraeum* IMS101. *Scientific*  
511 *Reports*, 4, 6187. <https://doi.org/10.1038/srep06187>
- 512 Powell, R. J. (1972). Solubility of 16 gases in heptacosfluorotributylamine and carbon disulfide.  
513 *Journal of Chemical & Engineering Data*, 17(3), 302–304.  
514 <https://doi.org/10.1021/je60054a024>
- 515 Puente-Sánchez, F., Arce-Rodríguez, A., Oggerin, M., García-Villadangos, M., Moreno-Paz, M.,  
516 Blanco, Y., ... Parro, V. (2018). Viable cyanobacteria in the deep continental subsurface.  
517 *Proceedings of the National Academy of Sciences of the United States of America*, 115(42),  
518 10702–10707. <https://doi.org/10.1073/pnas.1808176115>
- 519 Repeta, D. J., Ferrón, S., Sosa, O. A., Johnson, C. G., Repeta, L. D., Acker, M., ... Karl, D. M.  
520 (2016). Marine methane paradox explained by bacterial degradation of dissolved organic  
521 matter. *Nature Geoscience*, 9(12), 884–887. <https://doi.org/10.1038/ngeo2837>
- 522 Rhee, T. S., Kettle, A. J., & Andreae, M. O. (2009). Methane and nitrous oxide emissions from  
523 the ocean: A reassessment using basin-wide observations in the Atlantic. *Journal of*  
524 *Geophysical Research*, 114(D12), D12304. <https://doi.org/10.1029/2008JD011662>
- 525 Savitzky, A., & Golay, M. J. E. (1964). Smoothing and differentiation of data by simplified least  
526 squares procedures. *Analytical Chemistry*, 36(8), 1627–1639.  
527 <https://doi.org/10.1021/ac60214a047>
- 528 Schlüter, M., & Gentz, T. (2008). Application of membrane inlet mass spectrometry for online  
529 and in situ analysis of methane in aquatic environments. *Journal of the American Society*  
530 *for Mass Spectrometry*, 19(10), 1395–1402. <https://doi.org/10.1016/j.jasms.2008.07.021>
- 531 Scranton, M. I., & Farrington, J. W. (1977). Methane Production in the Waters off Walvis Bay.  
532 *Journal of Geophysical Research*, 82(31), 4947–4953.  
533 <https://doi.org/10.1029/JC082i031p04947>
- 534 Stal, L. J., & Moezelaar, R. (1997). Fermentation in Cyanobacteria. *FEMS Microbiology*  
535 *Reviews*, 21(2), 179–211. <https://doi.org/10.1111/j.1574-6976.1997.tb00350.x>
- 536 Stanier, R. Y., Deruelles, J., Rippka, R., Herdman, M., & Waterbury, J. B. (1979). Generic  
537 assignments, strain histories and properties of pure cultures of Cyanobacteria.  
538 *Microbiology*, 111(1), 1–61. <https://doi.org/10.1099/00221287-111-1-1>
- 539 Tian, H., Langenfelds, R., Thornton, B. F., Kleinen, T., Locatelli, R., Etiope, G., ... Covey, K.

- 540 (2016). The global methane budget 2000–2012. *Earth System Science Data*, 8(2), 697–751.  
541 <https://doi.org/10.5194/essd-8-697-2016>
- 542 Tuboly, E., Szabó, A., Garab, D., Bartha, G., Janovszky, Á., Ero's, G., ... Boros, M. (2013).  
543 Methane biogenesis during sodium azide-induced chemical hypoxia in rats. *American*  
544 *Journal of Physiology-Cell Physiology*, 304(2), C207–C214.  
545 <https://doi.org/10.1152/ajpcell.00300.2012>
- 546 Visser, P. M., Verspagen, J. M. H., Sandrini, G., Stal, L. J., Matthijs, H. C. P., Davis, T. W., ...  
547 Huisman, J. (2016). How rising CO<sub>2</sub> and global warming may stimulate harmful  
548 cyanobacterial blooms. *Harmful Algae*, 54, 145–159.  
549 <https://doi.org/10.1016/j.hal.2015.12.006>
- 550 Wang, Q., Dore, J. E., & McDermott, T. R. (2017). Methylphosphonate metabolism by  
551 *Pseudomonas* sp. populations contributes to the methane oversaturation paradox in an oxic  
552 freshwater lake. *Environmental Microbiology*, 19(6), 2366–2378.  
553 <https://doi.org/10.1111/1462-2920.13747>
- 554 Yao, M., Henny, C., & Maresca, J. A. (2016). Freshwater bacteria release methane as a by-  
555 product of phosphorus acquisition. *Applied and Environmental Microbiology*, 82(23),  
556 6994–7003. <https://doi.org/10.1128/AEM.02399-16>
- 557 Zheng, Y., Harris, D. F., Yu, Z., Fu, Y., Poudel, S., Ledbetter, R. N., ... Harwood, C. S. (2018).  
558 A pathway for biological methane production using bacterial iron-only nitrogenase. *Nature*  
559 *Microbiology*, 3(3), 281–286. <https://doi.org/10.1038/s41564-017-0091-5>
- 560
- 561



562 **Fig. S1.** Temporal profiles of CH<sub>4</sub>, O<sub>2</sub> and cyanobacterial derived Chl a between July 2014 and  
563 July 2016. The CH<sub>4</sub> data was measured every 1 - 4 weeks depending on season using a GC-FID  
564 as described in Grossart *et al.* (Grossart *et al.*, 2011). O<sub>2</sub> and Chl a were measured hourly using a  
565 YSI and a BBE probe (see [www.lake-lab.de](http://www.lake-lab.de)), respectively.

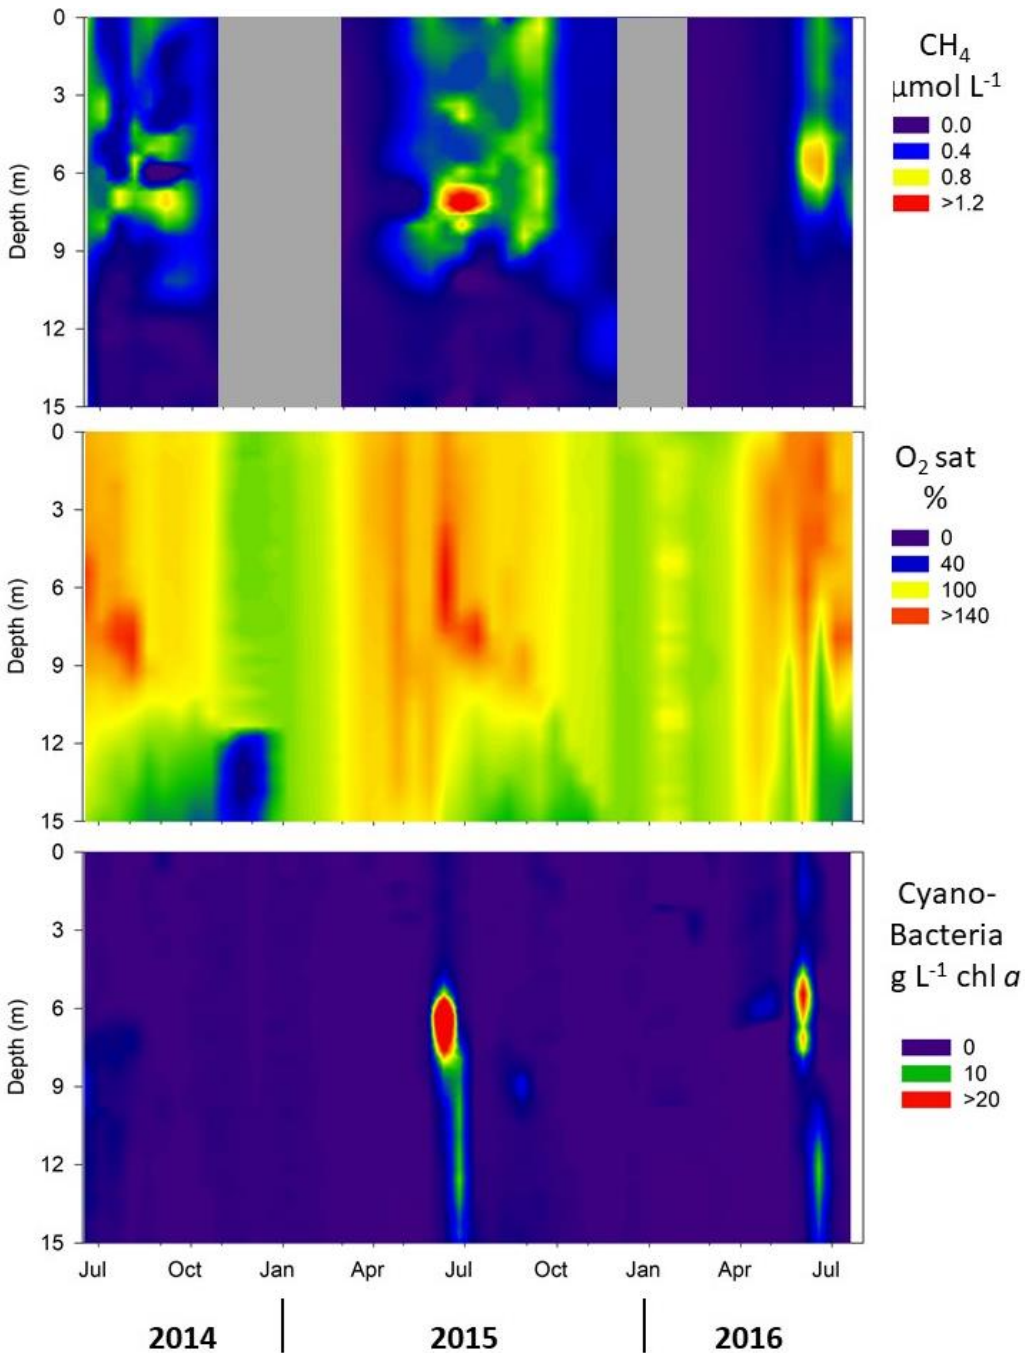

566

567 **Fig. S2.** Continuous measurements of CH<sub>4</sub> and oxygen under light/dark cycles using a membrane  
568 inlet mass spectrometer (MIMS) in 17 different cyanobacterial cultures. A decrease in CH<sub>4</sub>  
569 concentration is a result of reduced (or no) production coupled with degassing from the  
570 supersaturated, continuously-mixing, semi-open incubation chamber towards equilibrium with  
571 atmospheric CH<sub>4</sub> (2.5 nM and 2.1 nM for freshwater and seawater, respectively). Calculated CH<sub>4</sub>  
572 production rates account for the continuous emission of CH<sub>4</sub> from the incubation chamber for as  
573 long as the CH<sub>4</sub> concentrations are supersaturated. The light regime for the experiments was as  
574 follows: dark (black bar) from 19:30 to 09:00 then light intensity (yellow bar) was programmed to  
575 increase to 60, 120, 180, 400  $\mu\text{mol quanta m}^{-2} \text{s}^{-1}$  with a hold time of 1.5 h at each intensity. After  
576 maximum light period the intensity was programmed to decrease in reverse order with the same  
577 hold times until complete darkness again at 19:30.

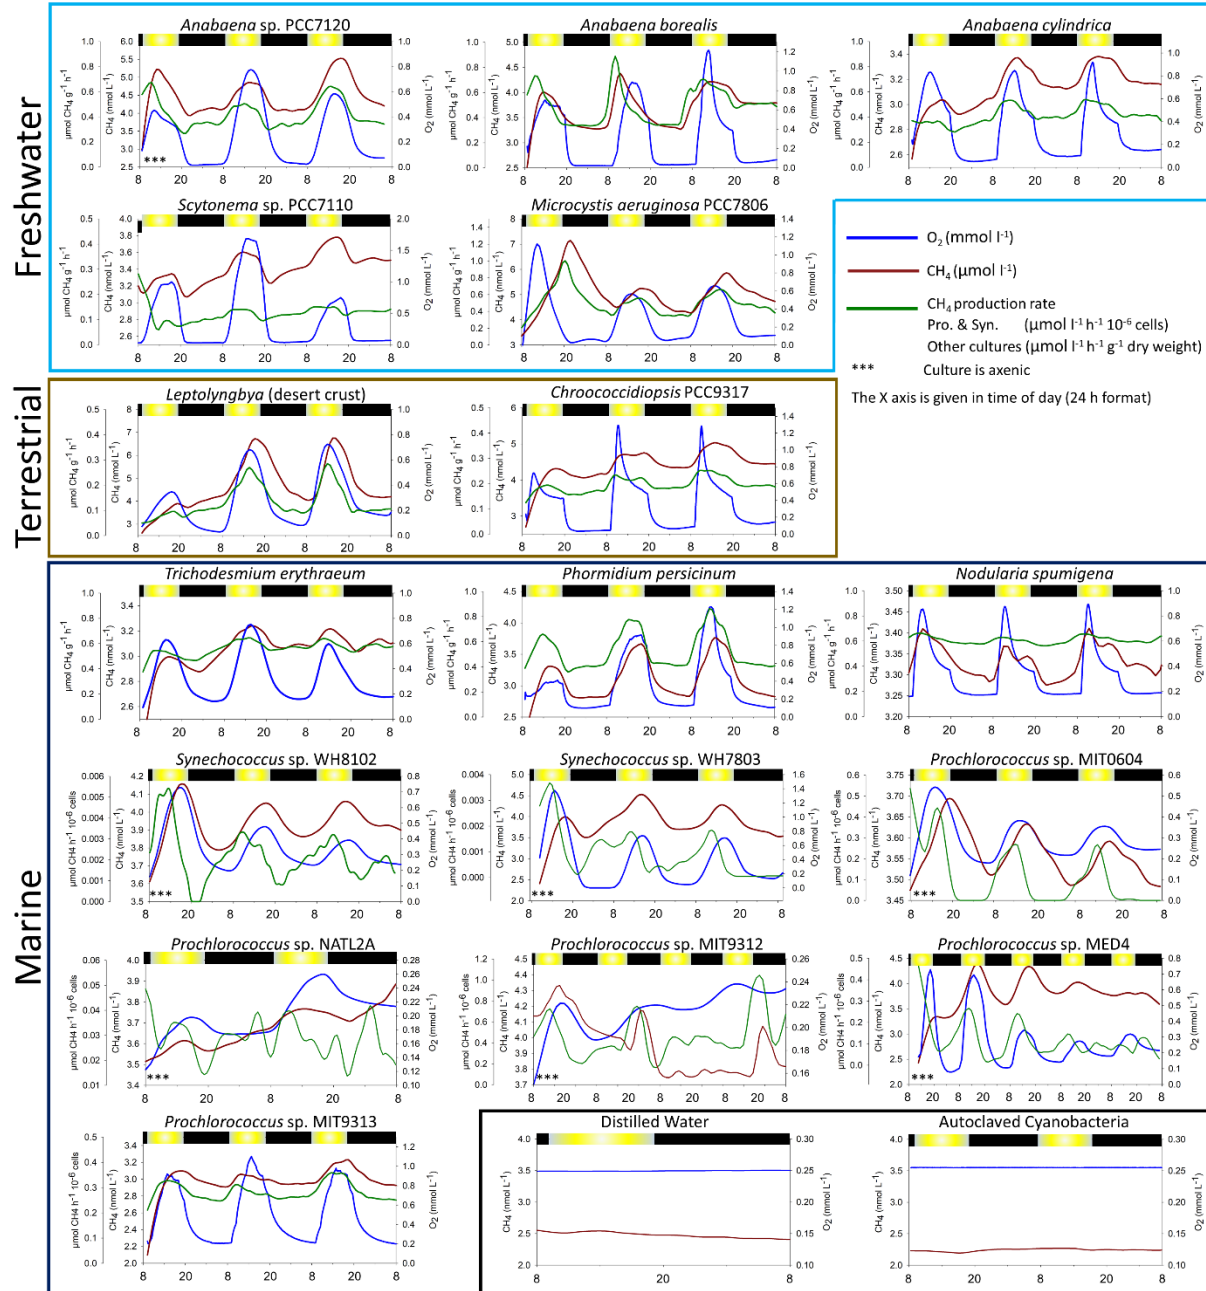

579 **Fig. S3.** Raw signal obtained from mass 15 (CH<sub>4</sub>) and mass 40 (Argon) plotted against the  
580 calculated solubility at different salinities at 30 °C. The signal in both cases is linearly correlated  
581 to the concentration of the dissolved gas. The ratio between the two masses was extrapolated  
582 between 0 and 50 ppt and was used for calculating the CH<sub>4</sub> concentration.

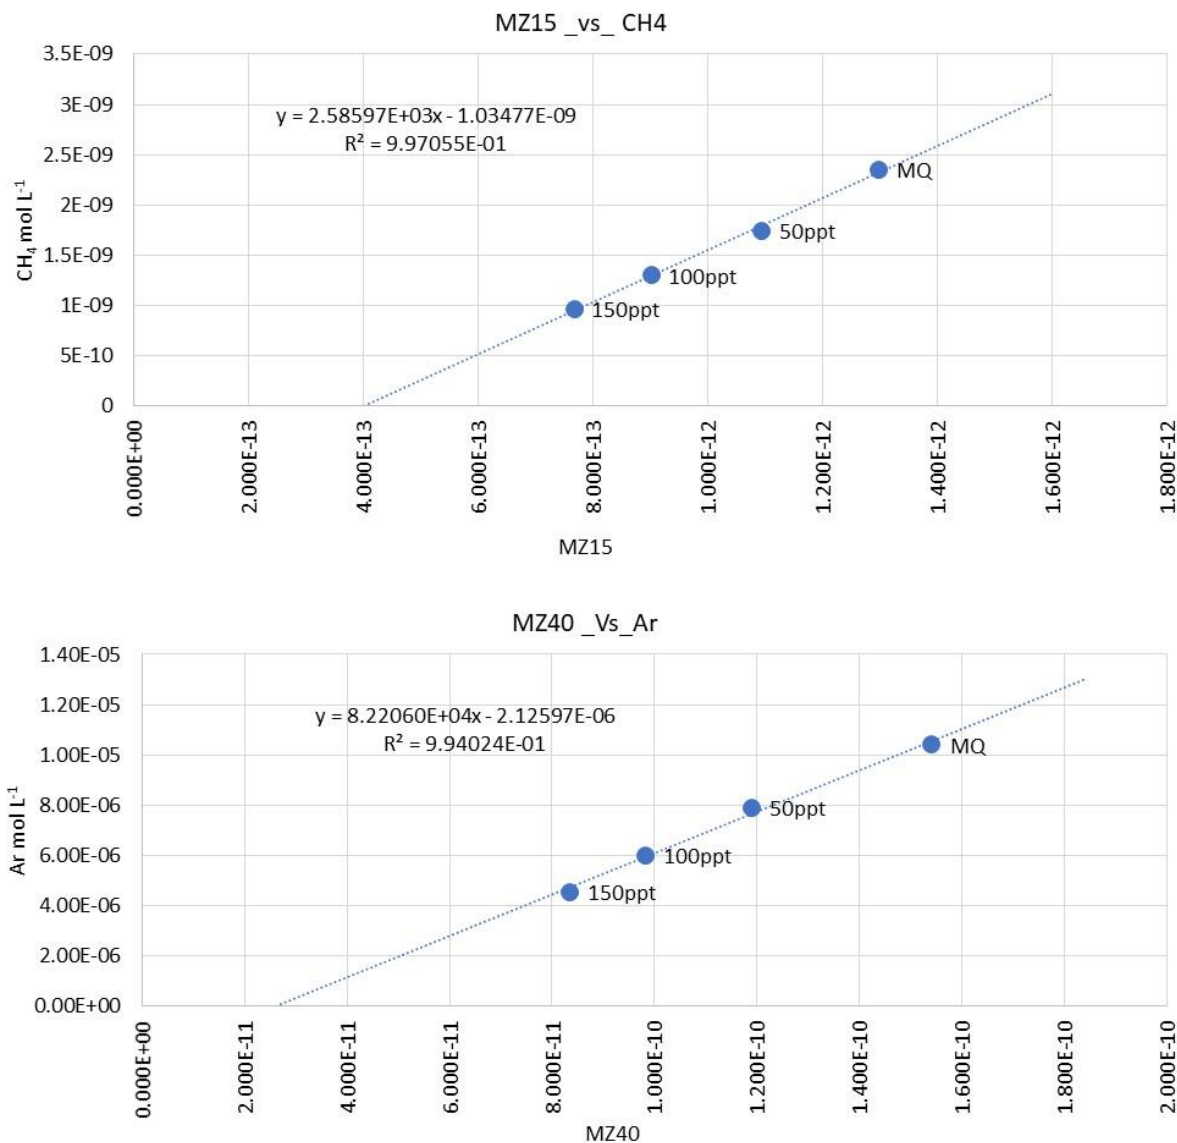

583

584

585 **Fig. S4.** Community composition of the cyanobacterial cultures as obtained when sequenced using  
 586 *Archaea* specific primers. Methanogenic *Archaea* (red) are in most cases lower than 0.1% of the  
 587 obtained sequences. In the absence of *Archaea* DNA template, the primers amplify DNA of  
 588 *Bacteria*. The background presence or complete absence of methanogens was confirmed by qPCR  
 589 of the *mcrA* gene.

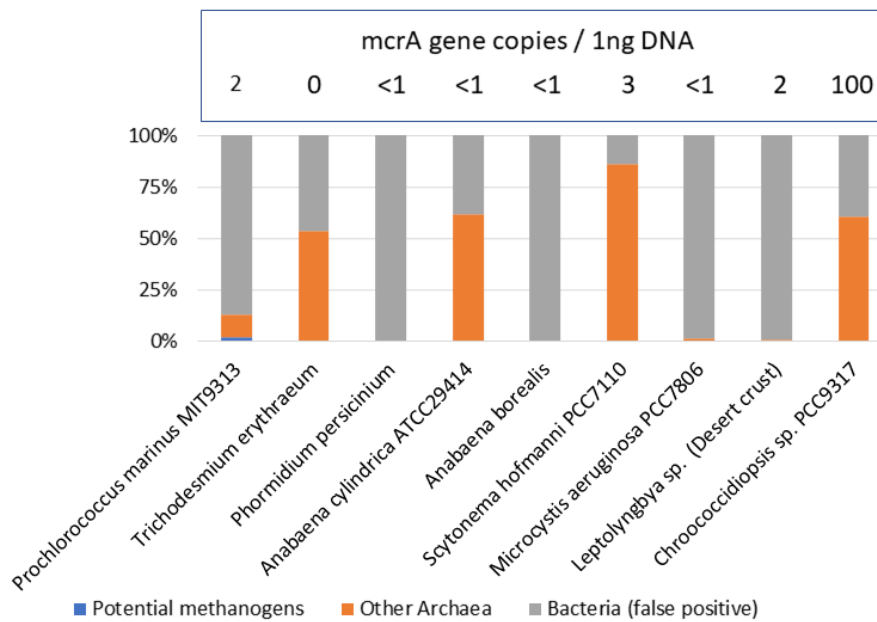

590

591

592

593

594

595

596

597

598 **Fig. S5.** Average CH<sub>4</sub> production rates ( $\mu\text{mol g}_{\text{DW}}^{-1} \text{h}^{-1}$ ) obtained from multiple long-term  
 599 measurements (2-5 days) with a membrane inlet mass spectrometer. The rates are shown by colour  
 600 according to the environment from which the *Cyanobacteria* were originally isolated; dark blue,  
 601 light blue and green for marine, freshwater and soil environments, respectively. The rates are  
 602 presented in comparison to three known methanogens. Rates for the methanogens were obtained  
 603 from references: Mountfort and Asher (Mountfort and Asher, 1979), Kröninger *et al.* (Kröninger  
 604 *et al.*, 2017) and Gerhard *et al.* (Gerhard *et al.*, 1993). Rates for eukaryotes including marine algae  
 605 and terrestrial plants were taken from Lenhart *et al.* (Lenhart *et al.*, 2016), Keppler *et al.* (Keppler  
 606 *et al.*, 2006), Brüggemann *et al.* (Brüggemann *et al.*, 2009), Wishkermann *et al.* (Wishkermann *et*  
 607 *al.*, 2011) and Qaderi *et al.* (Qaderi and Reid, 2009) No emission rates (on a dry weight basis) are  
 608 available for fungi and animals.

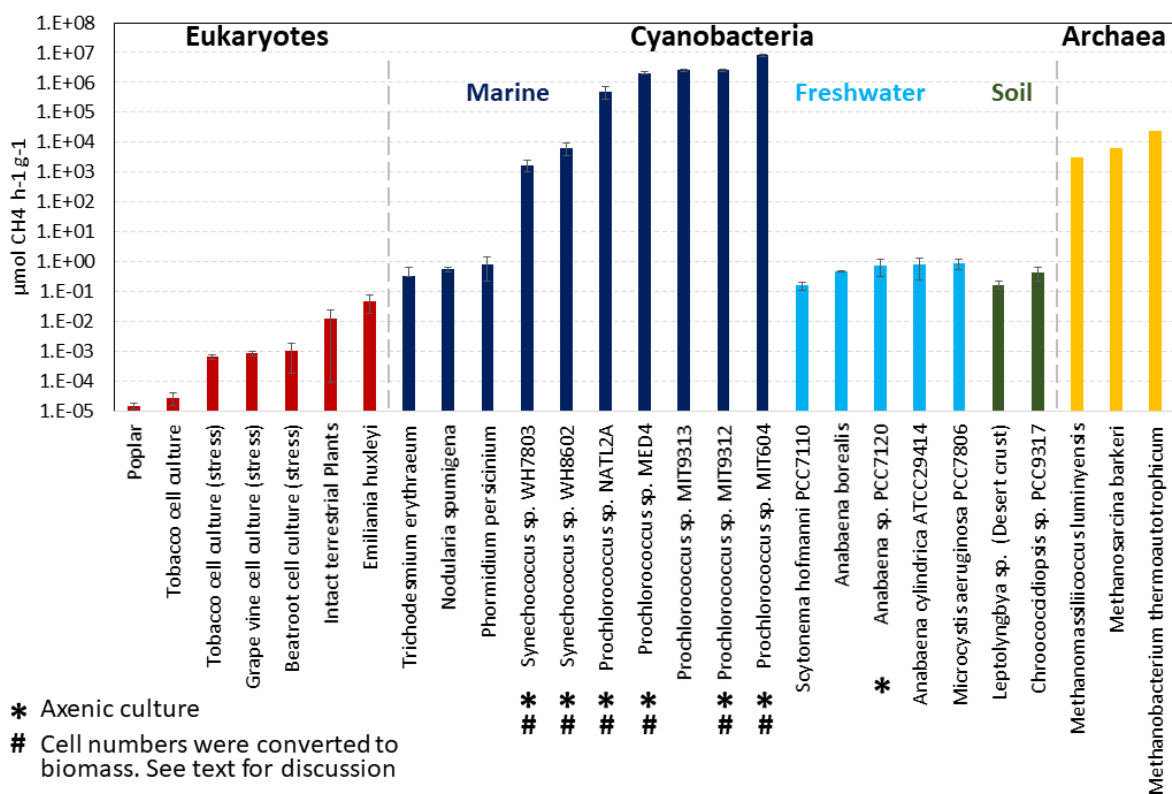

609
